# Supplementary material for: Converting the personalized biomolecular corona of graphene oxide nanoflakes into a high-throughput diagnostic test for early cancer detection
Source: Royal Society of Chemistry journal article supplement (doi:10.1039/c9nr01413f), 2019-01-01
Supplement: c9nr01413f1.pdf [file c9nr01413f1.pdf]

## Electronic Supplementary Information

### **Converting the personalized biomolecular corona of graphene oxide nanoflakes into a high-throughput diagnostic test for early cancer detection**

Massimiliano Papi,<sup>1#</sup> Valentina Palmieri,<sup>1#</sup> Luca Digiacomo,<sup>2</sup> Francesca Giulimondi,<sup>2</sup> Sara Palchetti,<sup>2</sup> Gabriele Ciasca,<sup>1</sup> Giordano Perini,<sup>1</sup> Damiano Caputo,<sup>3</sup> Maria Cristina Cartillone,<sup>3</sup> Chiara Cascone,<sup>3</sup> Roberto Coppola,<sup>3</sup> Anna Laura Capriotti,<sup>4</sup> Aldo Laganà,<sup>4</sup> Daniela Pozzi,<sup>2</sup> Giulio Caracciolo<sup>2\*</sup>

1 Institute of Physics, Fondazione Policlinico Universitario A. Gemelli, IRCCS - Università Cattolica del Sacro Cuore, Rome, Italy

2 Department of Molecular Medicine, Sapienza University of Rome, Viale Regina Elena 291,00161, Rome, Italy

3 University Campus-Biomedico di Roma, Via Alvaro del Portillo 200, 00128, Rome, Italy

4 Department of Chemistry, Sapienza University of Rome, P.le Aldo Moro 5, 00185, Rome, Italy

\*Corresponding Author: [giulio.caracciolo@uniroma1.it](mailto:giulio.caracciolo@uniroma1.it)

# These authors contributed equally

**TABLE S1.** Clinical and demographic characteristics of pancreatic cancer patients.

|                           |                  |
|---------------------------|------------------|
| <b>Patients (n.)</b>      | 35               |
| <b>Sex</b>                |                  |
| Male                      | 21               |
| Female                    | 14               |
| <b>Median age (years)</b> | 71 (range 54-85) |
| cT1 N0 M0                 | 2                |
| cT2 N0 M0                 | 7                |
| cT2 N+ M0                 | 6                |
| cT2 N+ M+                 | 2                |
| cT3 N0 M0                 | 2                |
| cT3 N+ M0                 | 4                |
| cT4 N+ M0                 | 6                |
| cT4 N+ M+                 | 6                |

**TABLE S2.** Clinical and demographic characteristics of healthy volunteers.

|                              |                  |
|------------------------------|------------------|
| <b>Patients (n.)</b>         | 35               |
| <b>Sex</b>                   |                  |
| Male                         | 20               |
| Female                       | 15               |
| <b>Median age (years)</b>    | 52 (range 41-85) |
| <b>Diagnosis</b>             |                  |
| Cholelithiasis               | 20               |
| Groin hernia                 | 6                |
| Colonic diverticular disease | 2                |
| Hemorrhoids                  | 2                |
| Lipoma                       | 1                |
| Mesenteric cystic            | 2                |
| Incisional hernia            | 2                |

**Figure S1.** A representative topography image of few GO flakes on mica substrate obtained by Atomic Force Microscopy (AFM) (a) and a representative GO sheet height profile H (b).

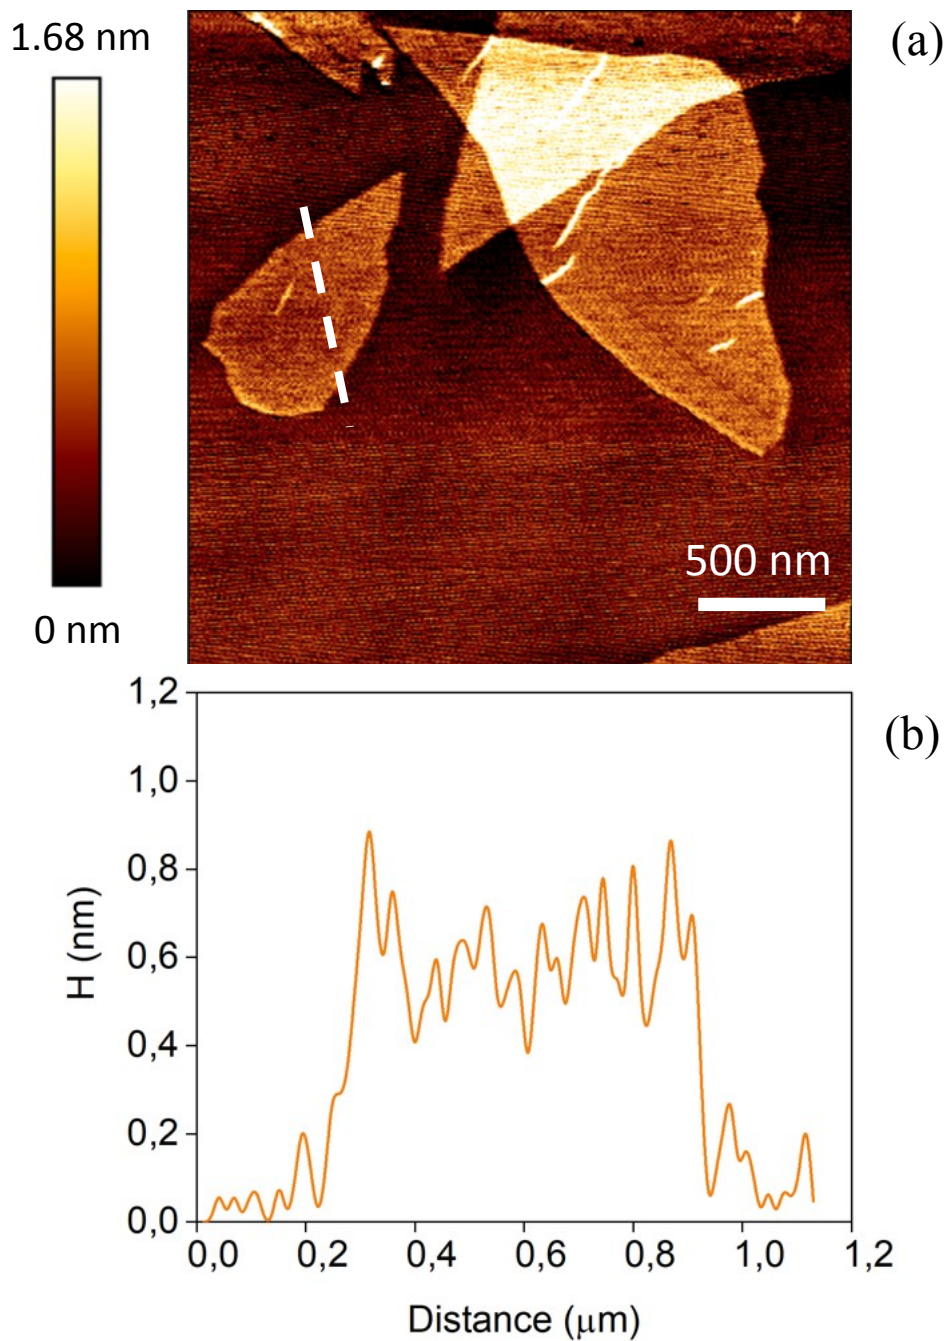

**Figure S2.** Size and Zeta-potential distributions of GO nanoflakes before (gray) and after incubation with human plasma from healthy subjects (blue profiles) and pancreatic cancer patients (red profiles). Shadows represent errors associated with experimental distributions.

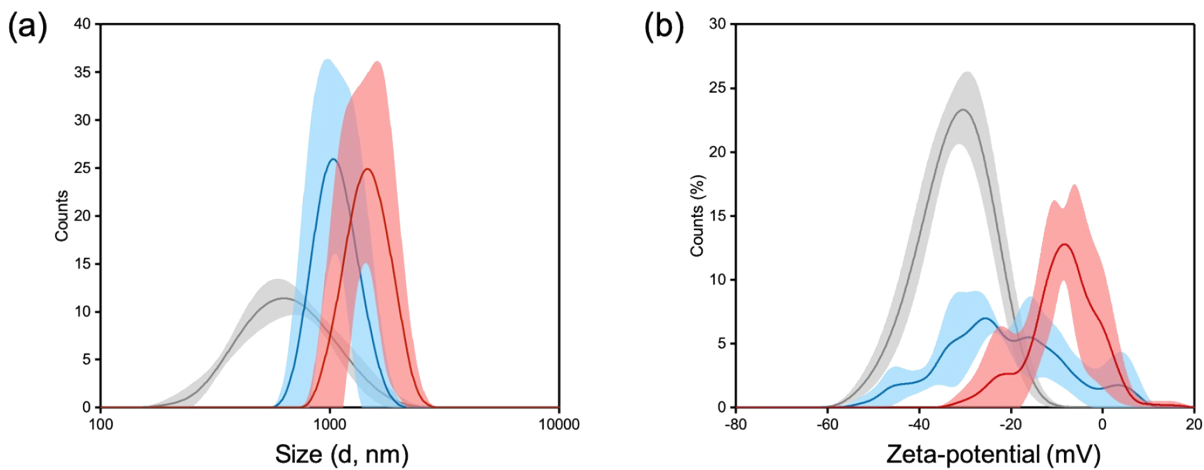

(c)

| Size (d. nm)   | Pdl   | Z-potential (mV) |
|----------------|-------|------------------|
| 715.3 ± 60.4   | 0.287 | -32.4 ± 7.5      |
| 1080.0 ± 174.6 | 0.286 | -24.5 ± 12.0     |
| 1485.0 ± 236.4 | 0.708 | -15.5 ± 7.7      |

**Figure S3.** Cropped image of SDS-PAGE gel. As evident, GO nanoflakes do not migrate in the gel, but they are confined in the wells (indicated by arrows).

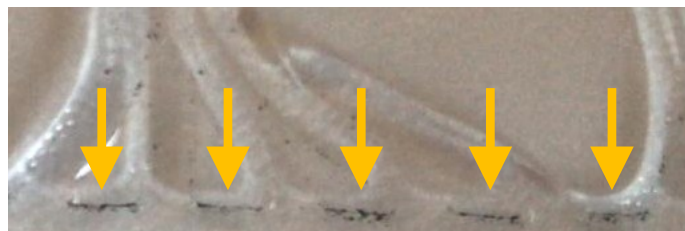

**TABLE S3. Performance measures obtained with cutoff 0.25 using Area2 as sensitive biomarker and confidence intervals limits. PPV=Positive Predictive Value NPV= Negative Predictive Value.**

|                    | <b>Value</b> | <b>Lower<br/>Limit</b> | <b>Upper<br/>Limit</b> |
|--------------------|--------------|------------------------|------------------------|
| <b>Sensitivity</b> | 0.76         | 0.55                   | 0.91                   |
| <b>Specificity</b> | 0.80         | 0.59                   | 0.93                   |
| <b>PPV</b>         | 0.79         | 0.58                   | 0.92                   |
| <b>NPV</b>         | 0.77         | 0.56                   | 0.92                   |

**TABLE S4. AUC values obtained after multivariate analysis of Areas testing several combinations.**

|                                            | AUC  |
|--------------------------------------------|------|
| <b>Area2</b>                               | 0.89 |
| <b>Area2+Area4</b>                         | 0.9  |
| <b>Area2+Area4+Area5</b>                   | 0.9  |
| <b>Area2+Area4+Area5+Area6</b>             | 0.92 |
| <b>Area2+Area4+Area5+Area6+Area7</b>       | 0.93 |
| <b>Area2+Area4+Area5+Area6+Area7+Area8</b> | 0.96 |



**TABLE S5. Parameters obtained with multivariate ROC analysis.**

| $\beta_0$ | $\beta_1$ | $\beta_2$ | $\beta_3$ | $\beta_4$ | $\beta_5$ | $\beta_6$ |
|-----------|-----------|-----------|-----------|-----------|-----------|-----------|
| 140.5     | -271.7    | -58.1     | -147.0    | -170.3    | -403.2    | -294.9    |

**TABLE S6. Relative protein abundance of proteins identified in the coronas of three healthy subjects and three pancreatic cancer patients. For each subject, the relative protein abundance is the average of three independent technical replicates.**

|    | Gene name          | Mol. weight [kDa] | Avg. pt | Healthy 1 | Healthy 2 | Healthy 3 | Average | SD      | Cancer 1 | Cancer 2 | Cancer 3 | Average | SD      |
|----|--------------------|-------------------|---------|-----------|-----------|-----------|---------|---------|----------|----------|----------|---------|---------|
| 1  | ACTA1;ACTG2;ACTA2; | 42.051            | 5.1415  | 0.0000%   | 0.0003%   | 0.0000%   | 0.0001% | 0.0002% | 0.0008%  | 0.0008%  | 0.0009%  | 0.0008% | 0.0001% |
| 2  | ACTB;ACTG1         | 41.736            | 5.2235  | 0.0138%   | 0.0118%   | 0.0126%   | 0.0127% | 0.0010% | 0.0335%  | 0.0292%  | 0.0409%  | 0.0346% | 0.0059% |
| 3  | ARF1;ARF3          | 20.697            | 6.876   | 0.0000%   | 0.0000%   | 0.0000%   | 0.0000% | 0.0000% | 0.0000%  | 0.0000%  | 0.0000%  | 0.0000% | 0.0000% |
| 4  | AFM                | 69.068            | 5.627   | 0.0866%   | 0.0806%   | 0.0787%   | 0.0819% | 0.0041% | 0.0757%  | 0.0699%  | 0.0712%  | 0.0723% | 0.0030% |
| 5  | ORM1               | 23.511            | 4.803   | 1.0259%   | 0.8338%   | 0.9062%   | 0.9220% | 0.0970% | 0.8711%  | 0.9480%  | 0.8087%  | 0.8759% | 0.0698% |
| 6  | ORM2               | 23.602            | 4.905   | 0.2262%   | 0.1928%   | 0.2489%   | 0.2226% | 0.0282% | 0.2565%  | 0.2900%  | 0.4388%  | 0.3284% | 0.0970% |
| 7  | SERPINA3           | 47.65             | 5.255   | 0.5171%   | 0.5461%   | 0.5819%   | 0.5484% | 0.0325% | 0.5158%  | 0.4867%  | 0.4669%  | 0.4898% | 0.0246% |
| 8  | SERPINA1           | 46.736            | 5.33    | 4.5546%   | 4.7503%   | 4.5180%   | 4.6076% | 0.1249% | 3.9469%  | 3.8004%  | 3.4903%  | 3.7459% | 0.2331% |
| 9  | A1BG               | 54.253            | 5.596   | 0.2472%   | 0.2273%   | 0.2745%   | 0.2497% | 0.0237% | 0.2086%  | 0.1561%  | 0.2259%  | 0.1969% | 0.0363% |
| 10 | SERPINF2           | 54.565            | 5.986   | 0.0428%   | 0.0493%   | 0.0444%   | 0.0455% | 0.0034% | 0.0365%  | 0.0356%  | 0.0292%  | 0.0337% | 0.0040% |
| 11 | AHSG               | 39.34             | 5.437   | 0.5678%   | 0.5088%   | 0.4712%   | 0.5159% | 0.0487% | 0.4286%  | 0.4827%  | 0.4163%  | 0.4426% | 0.0353% |
| 12 | A2M                | 163.29            | 6.149   | 1.2155%   | 1.2390%   | 1.2192%   | 1.2246% | 0.0126% | 0.9635%  | 0.9886%  | 0.9851%  | 0.9790% | 0.0136% |
| 13 | ANG                | 16.55             | 9.836   | 0.0000%   | 0.0000%   | 0.0000%   | 0.0000% | 0.0000% | 0.0000%  | 0.0000%  | 0.0000%  | 0.0000% | 0.0000% |
| 14 | AGT                | 53.154            | 6.003   | 0.0663%   | 0.0602%   | 0.0672%   | 0.0645% | 0.0038% | 0.0440%  | 0.0481%  | 0.0293%  | 0.0405% | 0.0099% |
| 15 | ANXA2              | 38.604            | 7.566   | 0.0000%   | 0.0003%   | 0.0000%   | 0.0001% | 0.0002% | 0.0008%  | 0.0000%  | 0.0004%  | 0.0004% | 0.0004% |
| 16 | ANO8               | 136.03            | 5.591   | 0.0053%   | 0.0035%   | 0.0049%   | 0.0045% | 0.0009% | 0.0101%  | 0.0100%  | 0.0077%  | 0.0092% | 0.0014% |
| 17 | SERPINC1           | 52.602            | 6.399   | 0.3064%   | 0.3099%   | 0.3209%   | 0.3124% | 0.0076% | 0.3144%  | 0.3257%  | 0.3051%  | 0.3151% | 0.0103% |
| 18 | APOA1              | 30.777            | 5.524   | 5.2846%   | 5.0547%   | 5.0100%   | 5.1164% | 0.1473% | 6.7152%  | 6.5027%  | 6.9524%  | 6.7234% | 0.2249% |
| 19 | APOA2              | 11.175            | 6.438   | 2.2011%   | 1.9394%   | 1.9548%   | 2.0318% | 0.1469% | 2.1501%  | 1.8841%  | 2.4249%  | 2.1530% | 0.2704% |
| 20 | APOA4              | 45.398            | 5.178   | 0.2301%   | 0.2159%   | 0.2390%   | 0.2283% | 0.0117% | 0.3718%  | 0.3741%  | 0.3698%  | 0.3719% | 0.0022% |
| 21 | APOB               | 515.6             | 6.729   | 0.1609%   | 0.1562%   | 0.1634%   | 0.1602% | 0.0037% | 0.1081%  | 0.1119%  | 0.1045%  | 0.1082% | 0.0037% |
| 22 | APOC1              | 9.3318            | 8.757   | 0.1933%   | 0.1735%   | 0.2297%   | 0.1988% | 0.0285% | 0.2039%  | 0.1650%  | 0.1784%  | 0.1824% | 0.0198% |
| 23 | APOC2              | 11.284            | 4.499   | 0.1786%   | 0.1638%   | 0.1850%   | 0.1758% | 0.0109% | 0.1202%  | 0.1328%  | 0.0831%  | 0.1120% | 0.0259% |
| 24 | APOC3              | 10.852            | 5.121   | 0.3460%   | 0.4422%   | 0.3457%   | 0.3779% | 0.0556% | 0.5899%  | 0.7106%  | 0.6114%  | 0.6373% | 0.0644% |
| 25 | APOC4              | 14.553            | 8.885   | 0.0000%   | 0.0000%   | 0.0000%   | 0.0000% | 0.0000% | 0.0000%  | 0.0000%  | 0.0000%  | 0.0000% | 0.0000% |
| 26 | APOD               | 21.275            | 4.932   | 0.1029%   | 0.0821%   | 0.1268%   | 0.1039% | 0.0224% | 0.1211%  | 0.1284%  | 0.0881%  | 0.1126% | 0.0215% |
| 27 | APOE               | 36.154            | 5.544   | 0.3621%   | 0.3180%   | 0.4274%   | 0.3692% | 0.0550% | 0.1597%  | 0.1517%  | 0.1231%  | 0.1448% | 0.0192% |
| 28 | APOF               | 35.399            | 5.378   | 0.0052%   | 0.0043%   | 0.0051%   | 0.0049% | 0.0005% | 0.0124%  | 0.0090%  | 0.0085%  | 0.0100% | 0.0021% |
| 29 | APOL1              | 43.974            | 5.565   | 0.0037%   | 0.0085%   | 0.0086%   | 0.0069% | 0.0028% | 0.0114%  | 0.0138%  | 0.0171%  | 0.0141% | 0.0029% |
| 30 | APOM               | 21.253            | 5.729   | 0.0259%   | 0.0238%   | 0.0296%   | 0.0264% | 0.0029% | 0.0530%  | 0.0530%  | 0.0384%  | 0.0482% | 0.0084% |
| 31 | LPA                | 501.31            | 5.61    | 0.0005%   | 0.0006%   | 0.0006%   | 0.0006% | 0.0001% | 0.0007%  | 0.0008%  | 0.0005%  | 0.0006% | 0.0002% |
| 32 | ATRN               | 158.54            | 7.026   | 0.0007%   | 0.0005%   | 0.0005%   | 0.0006% | 0.0001% | 0.0005%  | 0.0003%  | 0.0002%  | 0.0004% | 0.0002% |
| 33 | APOH               | 38.298            | 7.777   | 0.1484%   | 0.1667%   | 0.1458%   | 0.1536% | 0.0114% | 0.1079%  | 0.1359%  | 0.1393%  | 0.1277% | 0.0172% |
| 34 | B2M                | 13.714            | 6.212   | 0.0021%   | 0.0024%   | 0.0029%   | 0.0025% | 0.0004% | 0.0011%  | 0.0031%  | 0.0024%  | 0.0022% | 0.0010% |
| 35 | BDT                | 61.132            | 5.935   | 0.0004%   | 0.0006%   | 0.0004%   | 0.0005% | 0.0001% | 0.0000%  | 0.0010%  | 0.0007%  | 0.0006% | 0.0005% |
| 36 | CRP                | 67.033            | 7.007   | 0.0880%   | 0.0870%   | 0.0968%   | 0.0906% | 0.0054% | 0.0901%  | 0.0893%  | 0.0669%  | 0.0821% | 0.0132% |
| 37 | C4BP               | 28.357            | 4.933   | 0.0094%   | 0.0127%   | 0.0099%   | 0.0106% | 0.0018% | 0.0061%  | 0.0078%  | 0.0079%  | 0.0073% | 0.0010% |
| 38 | C4BPB              | 15.892            | 4.157   | 0.0005%   | 0.0000%   | 0.0000%   | 0.0002% | 0.0003% | 0.0059%  | 0.0078%  | 0.0065%  | 0.0068% | 0.0010% |
| 39 | CALML5             | 28.87             | 6.804   | 0.0027%   | 0.0027%   | 0.0030%   | 0.0028% | 0.0002% | 0.0063%  | 0.0054%  | 0.0059%  | 0.0059% | 0.0004% |
| 40 | CA1                | 29.246            | 7.124   | 0.0000%   | 0.0000%   | 0.0000%   | 0.0000% | 0.0000% | 0.0000%  | 0.0000%  | 0.0000%  | 0.0000% | 0.0000% |
| 41 | CA2                | 48.424            | 7.476   | 0.0002%   | 0.0014%   | 0.0004%   | 0.0007% | 0.0006% | 0.0000%  | 0.0003%  | 0.0003%  | 0.0002% | 0.0002% |
| 42 | CPB2               | 52.286            | 7.022   | 0.0036%   | 0.0040%   | 0.0047%   | 0.0041% | 0.0006% | 0.0022%  | 0.0066%  | 0.0055%  | 0.0048% | 0.0023% |
| 43 | CPN1               | 60.556            | 5.695   | 0.0112%   | 0.0113%   | 0.0097%   | 0.0107% | 0.0009% | 0.0095%  | 0.0085%  | 0.0071%  | 0.0084% | 0.0012% |
| 44 | CPN2               | 38.087            | 5.203   | 0.0166%   | 0.0197%   | 0.0221%   | 0.0195% | 0.0028% | 0.0290%  | 0.0291%  | 0.0219%  | 0.0267% | 0.0041% |
| 45 | CD5L               | 122.2             | 5.443   | 0.2367%   | 0.1987%   | 0.2420%   | 0.2258% | 0.0236% | 0.1307%  | 0.1444%  | 0.1529%  | 0.1426% | 0.0112% |
| 46 | CP                 | 52.494            | 5.973   | 0.1598%   | 0.1776%   | 0.1690%   | 0.1688% | 0.0089% | 0.1482%  | 0.1309%  | 0.1335%  | 0.1375% | 0.0094% |
| 47 | CLU                | 51.778            | 5.251   | 0.0000%   | 0.0010%   | 0.0011%   | 0.0007% | 0.0006% | 0.0012%  | 0.0019%  | 0.0013%  | 0.0015% | 0.0004% |
| 48 | F9                 | 251.7             | 5.759   | 0.0002%   | 0.0002%   | 0.0003%   | 0.0002% | 0.0000% | 0.0002%  | 0.0003%  | 0.0002%  | 0.0002% | 0.0001% |
| 49 | F5                 | 70.108            | 7.902   | 0.0000%   | 0.0000%   | 0.0000%   | 0.0000% | 0.0000% | 0.0003%  | 0.0000%  | 0.0001%  | 0.0001% | 0.0001% |
| 50 | F11                | 67.791            | 7.533   | 0.0112%   | 0.0095%   | 0.0120%   | 0.0109% | 0.0013% | 0.0107%  | 0.0098%  | 0.0094%  | 0.0099% | 0.0007% |
| 51 | F12                | 75.51             | 6.075   | 0.0017%   | 0.0021%   | 0.0017%   | 0.0018% | 0.0002% | 0.0000%  | 0.0013%  | 0.0016%  | 0.0010% | 0.0009% |
| 52 | F13B               | 18.502            | 7.966   | 0.0000%   | 0.0000%   | 0.0000%   | 0.0000% | 0.0000% | 0.0000%  | 0.0000%  | 0.0000%  | 0.0000% | 0.0000% |
| 53 | CFI1               | 26.016            | 9.236   | 0.0074%   | 0.0063%   | 0.0062%   | 0.0067% | 0.0006% | 0.0080%  | 0.0005%  | 0.0066%  | 0.0051% | 0.0040% |
| 54 | CIQA               | 26.721            | 8.609   | 0.0394%   | 0.0428%   | 0.0447%   | 0.0423% | 0.0027% | 0.0586%  | 0.0528%  | 0.0499%  | 0.0538% | 0.0044% |
| 55 | CIQB               | 25.773            | 8.318   | 0.0624%   | 0.0612%   | 0.0688%   | 0.0641% | 0.0041% | 0.0446%  | 0.0582%  | 0.0561%  | 0.0530% | 0.0073% |
| 56 | CIQC               | 80.118            | 5.894   | 0.0054%   | 0.0052%   | 0.0060%   | 0.0055% | 0.0004% | 0.0053%  | 0.0036%  | 0.0033%  | 0.0041% | 0.0011% |
| 57 | C1R                | 76.684            | 4.713   | 0.0134%   | 0.0123%   | 0.0136%   | 0.0131% | 0.0007% | 0.0142%  | 0.0131%  | 0.0123%  | 0.0132% | 0.0009% |
| 58 | C1S                | 83.267            | 7.129   | 0.0120%   | 0.0129%   | 0.0133%   | 0.0127% | 0.0006% | 0.0085%  | 0.0087%  | 0.0085%  | 0.0086% | 0.0011% |
| 59 | C2                 | 187.15            | 6.098   | 1.1828%   | 1.1908%   | 1.1915%   | 1.1884% | 0.0048% | 0.9161%  | 0.9730%  | 0.9479%  | 0.9456% | 0.0285% |
| 60 | C3                 | 192.78            | 6.747   | 0.0141%   | 0.0143%   | 0.0149%   | 0.0144% | 0.0004% | 0.0092%  | 0.0102%  | 0.0095%  | 0.0097% | 0.0005% |
| 61 | C4A                | 192.75            | 6.949   | 0.2879%   | 0.2515%   | 0.2705%   | 0.2700% | 0.0182% | 0.1979%  | 0.2032%  | 0.2028%  | 0.2013% | 0.0030% |
| 62 | C4B;C4B_2          | 188.3             | 6.21    | 0.0269%   | 0.0244%   | 0.0260%   | 0.0257% | 0.0013% | 0.0196%  | 0.0176%  | 0.0208%  | 0.0194% | 0.0016% |
| 63 | C5                 | 104.79            | 6.418   | 0.0100%   | 0.0113%   | 0.0113%   | 0.0109% | 0.0008% | 0.0075%  | 0.0059%  | 0.0079%  | 0.0071% | 0.0010% |
| 64 | C6                 | 93.517            | 6.146   | 0.0141%   | 0.0143%   | 0.0159%   | 0.0148% | 0.0010% | 0.0108%  | 0.0102%  | 0.0128%  | 0.0113% | 0.0014% |
| 65 | C7                 | 65.163            | 6.124   | 0.0098%   | 0.0073%   | 0.0115%   | 0.0095% | 0.0021% | 0.0123%  | 0.0112%  | 0.0079%  | 0.0105% | 0.0023% |

|     |                                     |        |        |         |         |         |         |         |         |         |         |         |         |
|-----|-------------------------------------|--------|--------|---------|---------|---------|---------|---------|---------|---------|---------|---------|---------|
| 66  | C8A                                 | 67.046 | 7.924  | 0.0065% | 0.0049% | 0.0074% | 0.0063% | 0.0013% | 0.0045% | 0.0032% | 0.0037% | 0.0038% | 0.0007% |
| 67  | C8B                                 | 22.277 | 8.24   | 0.0509% | 0.0487% | 0.0615% | 0.0537% | 0.0068% | 0.0404% | 0.0391% | 0.0443% | 0.0413% | 0.0027% |
| 68  | C8G                                 | 63.173 | 5.34   | 0.0400% | 0.0410% | 0.0461% | 0.0424% | 0.0033% | 0.0332% | 0.0368% | 0.0336% | 0.0345% | 0.0019% |
| 69  | C9                                  | 85.532 | 6.727  | 0.1272% | 0.1084% | 0.1121% | 0.1159% | 0.0099% | 0.0860% | 0.0838% | 0.0824% | 0.0841% | 0.0018% |
| 70  | CFB                                 | 27.033 | 7.488  | 0.0028% | 0.0029% | 0.0026% | 0.0028% | 0.0002% | 0.0031% | 0.0025% | 0.0030% | 0.0029% | 0.0003% |
| 71  | CFD                                 | 139.09 | 6.269  | 0.1845% | 0.1813% | 0.1875% | 0.1844% | 0.0031% | 0.1466% | 0.1655% | 0.1494% | 0.1538% | 0.0102% |
| 72  | CFH                                 | 37.65  | 7.146  | 0.0000% | 0.0000% | 0.0000% | 0.0000% | 0.0000% | 0.0000% | 0.0000% | 0.0000% | 0.0000% | 0.0000% |
| 73  | CFHR1                               | 30.65  | 6.059  | 0.0010% | 0.0008% | 0.0011% | 0.0009% | 0.0002% | 0.0000% | 0.0000% | 0.0005% | 0.0002% | 0.0003% |
| 74  | CFHR2                               | 65.75  | 7.281  | 0.0099% | 0.0098% | 0.0165% | 0.0121% | 0.0038% | 0.0130% | 0.0068% | 0.0135% | 0.0111% | 0.0037% |
| 75  | CFI                                 | 45.14  | 5.735  | 0.0195% | 0.0203% | 0.0236% | 0.0211% | 0.0022% | 0.0176% | 0.0207% | 0.0265% | 0.0216% | 0.0045% |
| 76  | SERPINA6                            | 25.038 | 5.386  | 0.0036% | 0.0034% | 0.0047% | 0.0039% | 0.0007% | 0.0000% | 0.0000% | 0.0000% | 0.0000% | 0.0000% |
| 77  | CSTA                                | 11.006 | 5.281  | 0.0095% | 0.0098% | 0.0100% | 0.0098% | 0.0003% | 0.0154% | 0.0218% | 0.0170% | 0.0181% | 0.0033% |
| 78  | CST3                                | 15.799 | 8.72   | 0.0000% | 0.0000% | 0.0007% | 0.0002% | 0.0004% | 0.0000% | 0.0000% | 0.0000% | 0.0000% | 0.0000% |
| 79  | DCD                                 | 11.284 | 6.227  | 0.2891% | 0.2886% | 0.2114% | 0.2630% | 0.0447% | 0.4078% | 0.3422% | 0.2070% | 0.3190% | 0.1024% |
| 80  | DSP                                 | 331.77 | 6.501  | 0.0001% | 0.0003% | 0.0001% | 0.0001% | 0.0001% | 0.0001% | 0.0001% | 0.0001% | 0.0001% | 0.0000% |
| 81  | EFEMP1                              | 54.64  | 4.824  | 0.0000% | 0.0000% | 0.0000% | 0.0000% | 0.0000% | 0.0000% | 0.0000% | 0.0000% | 0.0000% | 0.0000% |
| 82  | STOM                                | 31.73  | 7.743  | 0.0000% | 0.0000% | 0.0000% | 0.0000% | 0.0000% | 0.0000% | 0.0000% | 0.0000% | 0.0000% | 0.0000% |
| 83  | ECM1                                | 60.673 | 6.36   | 0.0026% | 0.0030% | 0.0023% | 0.0026% | 0.0004% | 0.0000% | 0.0000% | 0.0000% | 0.0000% | 0.0000% |
| 84  | FERM3                               | 75.952 | 6.654  | 0.0000% | 0.0000% | 0.0000% | 0.0000% | 0.0000% | 0.0000% | 0.0000% | 0.0000% | 0.0000% | 0.0000% |
| 85  | FGA                                 | 94.972 | 5.733  | 2.8739% | 2.5968% | 2.7946% | 2.7551% | 0.1427% | 0.9487% | 0.9079% | 0.8366% | 0.8977% | 0.0567% |
| 86  | FGB                                 | 55.928 | 8.11   | 3.0830% | 2.9746% | 3.1531% | 3.0720% | 0.0900% | 1.0615% | 1.1802% | 1.0912% | 1.1110% | 0.0618% |
| 87  | FGG                                 | 51.511 | 5.323  | 3.2052% | 2.9000% | 2.9466% | 3.0172% | 0.1644% | 1.2040% | 1.4585% | 1.2745% | 1.3123% | 0.1314% |
| 88  | FN1                                 | 262.62 | 5.432  | 0.1331% | 0.1291% | 0.1374% | 0.1332% | 0.0042% | 0.0203% | 0.0206% | 0.0195% | 0.0201% | 0.0006% |
| 89  | FBNL1                               | 77.213 | 4.961  | 0.0038% | 0.0027% | 0.0029% | 0.0031% | 0.0006% | 0.0020% | 0.0004% | 0.0009% | 0.0011% | 0.0008% |
| 90  | FCN2                                | 34.001 | 6.437  | 0.0010% | 0.0007% | 0.0010% | 0.0009% | 0.0002% | 0.0003% | 0.0016% | 0.0012% | 0.0010% | 0.0007% |
| 91  | FCN3                                | 32.903 | 6.338  | 0.0121% | 0.0169% | 0.0155% | 0.0149% | 0.0024% | 0.0101% | 0.0100% | 0.0051% | 0.0084% | 0.0028% |
| 92  | FLG                                 | 435.16 | 9.354  | 0.0000% | 0.0000% | 0.0000% | 0.0000% | 0.0000% | 0.0000% | 0.0000% | 0.0001% | 0.0000% | 0.0000% |
| 93  | FLG2                                | 248.07 | 8.118  | 0.0000% | 0.0000% | 0.0000% | 0.0000% | 0.0000% | 0.0000% | 0.0000% | 0.0000% | 0.0000% | 0.0000% |
| 94  | FLNA                                | 280.74 | 5.769  | 0.0000% | 0.0000% | 0.0000% | 0.0000% | 0.0000% | 0.0000% | 0.0000% | 0.0000% | 0.0000% | 0.0000% |
| 95  | LGALS3BP                            | 65.33  | 4.999  | 0.0037% | 0.0033% | 0.0044% | 0.0038% | 0.0006% | 0.0031% | 0.0010% | 0.0014% | 0.0018% | 0.0011% |
| 96  | GSN                                 | 85.696 | 5.98   | 0.0338% | 0.0309% | 0.0322% | 0.0323% | 0.0015% | 0.0562% | 0.0618% | 0.0406% | 0.0529% | 0.0110% |
| 97  | GPK3                                | 25.552 | 8.014  | 0.0030% | 0.0045% | 0.0042% | 0.0039% | 0.0008% | 0.0020% | 0.0016% | 0.0015% | 0.0017% | 0.0003% |
| 98  | GAPDH                               | 36.053 | 8.456  | 0.0015% | 0.0009% | 0.0005% | 0.0010% | 0.0005% | 0.0005% | 0.0004% | 0.0010% | 0.0006% | 0.0003% |
| 99  | HP                                  | 45.205 | 6.253  | 3.8388% | 3.5649% | 3.6850% | 3.6963% | 0.1373% | 2.7997% | 3.1206% | 2.9857% | 2.9687% | 0.1611% |
| 100 | HPR                                 | 39.029 | 6.76   | 0.0543% | 0.0458% | 0.0249% | 0.0417% | 0.0151% | 0.0469% | 0.0237% | 0.0345% | 0.0350% | 0.0116% |
| 101 | HBA1;HBA2                           | 15.257 | 8.863  | 1.4280% | 1.2719% | 1.2646% | 1.3215% | 0.0923% | 1.8735% | 1.9326% | 1.6005% | 1.8022% | 0.1772% |
| 102 | HBB                                 | 15.998 | 6.956  | 1.1303% | 1.2484% | 1.3777% | 1.2522% | 0.1237% | 2.8910% | 2.8917% | 2.7116% | 2.8314% | 0.1038% |
| 103 | HBD                                 | 16.055 | 7.932  | 0.0016% | 0.0017% | 0.0018% | 0.0017% | 0.0001% | 0.0089% | 0.0242% | 0.0087% | 0.0139% | 0.0089% |
| 104 | HPX                                 | 51.676 | 6.669  | 0.3741% | 0.4054% | 0.3570% | 0.3788% | 0.0246% | 0.5434% | 0.5691% | 0.5347% | 0.5491% | 0.0179% |
| 105 | SERPIND1                            | 57.07  | 6.58   | 0.0533% | 0.0513% | 0.0541% | 0.0529% | 0.0014% | 0.0688% | 0.0675% | 0.0677% | 0.0680% | 0.0007% |
| 106 | HGFAC                               | 70.681 | 6.916  | 0.0000% | 0.0000% | 0.0000% | 0.0000% | 0.0000% | 0.0000% | 0.0000% | 0.0000% | 0.0000% | 0.0000% |
| 107 | MST1;MST1L                          | 80.319 | 7.542  | 0.0000% | 0.0000% | 0.0000% | 0.0000% | 0.0000% | 0.0000% | 0.0000% | 0.0000% | 0.0000% | 0.0000% |
| 108 | HRG                                 | 59.578 | 7.189  | 0.0797% | 0.0581% | 0.0747% | 0.0708% | 0.0113% | 0.1073% | 0.0848% | 0.0772% | 0.0898% | 0.0157% |
| 109 | HRNR                                | 282.39 | 10.139 | 0.0022% | 0.0035% | 0.0036% | 0.0031% | 0.0008% | 0.0016% | 0.0019% | 0.0018% | 0.0017% | 0.0002% |
| 110 | N/A                                 | 37.654 | 6.172  | 2.0836% | 2.2621% | 1.8793% | 2.0750% | 0.1915% | 1.8194% | 2.0129% | 2.1369% | 1.9898% | 0.1600% |
| 111 | N/A                                 | 42.352 | 7.767  | 0.0000% | 0.0000% | 0.0000% | 0.0000% | 0.0000% | 0.0000% | 0.0000% | 0.0000% | 0.0000% | 0.0000% |
| 112 | IGHA1                               | 49.328 | 8.048  | 4.5539% | 4.4286% | 4.4350% | 4.4725% | 0.0706% | 5.3901% | 5.4700% | 5.7109% | 5.5237% | 0.1670% |
| 113 | IGHD                                | 35.9   | 7.38   | 2.4604% | 2.6018% | 2.4318% | 2.4980% | 0.0910% | 2.5699% | 2.0549% | 2.0255% | 2.2167% | 0.3062% |
| 114 | IGHG1                               | 41.287 | 7.711  | 0.4914% | 0.4031% | 0.4873% | 0.4606% | 0.0499% | 0.3669% | 0.3434% | 0.3532% | 0.3545% | 0.0118% |
| 115 | IGHG2                               | 35.94  | 7.095  | 0.1604% | 0.1717% | 0.1609% | 0.1643% | 0.0064% | 0.1378% | 0.1604% | 0.1744% | 0.1575% | 0.0185% |
| 116 | IGHG3                               | 49.439 | 6.44   | 0.6572% | 0.6602% | 0.6880% | 0.6685% | 0.0170% | 0.7937% | 0.8188% | 0.7426% | 0.7851% | 0.0388% |
| 117 | IGHG4                               | 12.82  | 8.912  | 0.0514% | 0.0234% | 0.0320% | 0.0356% | 0.0143% | 0.0373% | 0.0289% | 0.0295% | 0.0319% | 0.0047% |
| 118 | IGHM                                | 13.008 | 8.983  | 0.0461% | 0.0324% | 0.0398% | 0.0394% | 0.0068% | 0.0471% | 0.0437% | 0.0255% | 0.0388% | 0.0116% |
| 119 | IGHV1-18                            | 13.182 | 8.192  | 0.0278% | 0.0331% | 0.0279% | 0.0296% | 0.0030% | 0.0131% | 0.0239% | 0.0218% | 0.0196% | 0.0057% |
| 120 | IGHV1-69D;IGHV1-46;                 | 13.231 | 8.53   | 0.0000% | 0.0000% | 0.0000% | 0.0000% | 0.0000% | 0.0000% | 0.0000% | 0.0000% | 0.0000% | 0.0000% |
| 121 | IGHV2-26                            | 12.506 | 6.345  | 0.0000% | 0.0000% | 0.0000% | 0.0000% | 0.0000% | 0.0000% | 0.0000% | 0.0000% | 0.0000% | 0.0000% |
| 122 | IGHV2-5                             | 12.926 | 8.591  | 0.0652% | 0.0514% | 0.0579% | 0.0582% | 0.0069% | 0.0780% | 0.0855% | 0.0723% | 0.0786% | 0.0066% |
| 123 | IGHV3-13                            | 12.943 | 8.968  | 0.1185% | 0.1625% | 0.1546% | 0.1452% | 0.0235% | 0.1433% | 0.1893% | 0.2036% | 0.1788% | 0.0315% |
| 124 | IGHV3-15                            | 12.947 | 8.9625 | 0.2975% | 0.2681% | 0.2772% | 0.2809% | 0.0150% | 0.3358% | 0.3503% | 0.3214% | 0.3358% | 0.0145% |
| 125 | IGHV3-21;IGHV3-7;IGHV3-10;IGHV3-14; | 13.056 | 8.594  | 0.0136% | 0.0150% | 0.0126% | 0.0137% | 0.0012% | 0.0145% | 0.0129% | 0.0117% | 0.0130% | 0.0014% |
| 126 | IGHV3-23;IGHV3-30;IGHV3-31;         | 12.891 | 7.709  | 0.0000% | 0.0000% | 0.0000% | 0.0000% | 0.0000% | 0.0000% | 0.0021% | 0.0015% | 0.0012% | 0.0011% |
| 127 | IGHV3-49                            | 12.822 | 7.704  | 0.0000% | 0.0000% | 0.0161% | 0.0054% | 0.0093% | 0.0000% | 0.0000% | 0.0026% | 0.0009% | 0.0015% |
| 128 | IGHV3-64                            | 13.203 | 7.71   | 0.0177% | 0.0141% | 0.0150% | 0.0156% | 0.0019% | 0.0256% | 0.0242% | 0.0111% | 0.0203% | 0.0080% |
| 129 | IGHV3-64D                           | 12.839 | 8.641  | 0.0208% | 0.0152% | 0.0194% | 0.0185% | 0.0029% | 0.0259% | 0.0284% | 0.0174% | 0.0239% | 0.0058% |
| 130 | IGHV3-72                            | 13.017 | 7.035  | 0.0000% | 0.0000% | 0.0000% | 0.0000% | 0.0000% | 0.0000% | 0.0000% | 0.0000% | 0.0000% | 0.0000% |

|     |                      |        |        |         |         |         |         |         |         |         |         |         |         |
|-----|----------------------|--------|--------|---------|---------|---------|---------|---------|---------|---------|---------|---------|---------|
| 131 | IGHV3-74             | 13.124 | 9.43   | 0.0172% | 0.0167% | 0.0170% | 0.0170% | 0.0002% | 0.0000% | 0.0000% | 0.0102% | 0.0034% | 0.0059% |
| 132 | IGHV3-9;IGHV3-43D    | 13.815 | 8.2965 | 0.0187% | 0.0171% | 0.0171% | 0.0176% | 0.0009% | 0.0324% | 0.0424% | 0.0289% | 0.0346% | 0.0070% |
| 133 | IGHV4-28             | 12.674 | 8.167  | 0.0355% | 0.0337% | 0.0333% | 0.0342% | 0.0012% | 0.0248% | 0.0245% | 0.0198% | 0.0230% | 0.0028% |
| 134 | IGHV4-39;IGHV4-59;IG | 13.481 | 9.337  | 0.0248% | 0.0252% | 0.0354% | 0.0285% | 0.0060% | 0.0359% | 0.0428% | 0.0351% | 0.0379% | 0.0043% |
| 135 | IGHV5-51             | 18.098 | 4.964  | 0.1098% | 0.1196% | 0.1124% | 0.1139% | 0.0051% | 0.1341% | 0.1361% | 0.1007% | 0.1236% | 0.0199% |
| 136 | IGHV6-1              | 11.765 | 5.599  | 1.7298% | 2.4431% | 1.2021% | 1.7917% | 0.6228% | 2.4008% | 1.9232% | 2.4048% | 2.2429% | 0.2769% |
| 137 | JCHAIN               | 12.618 | 8.423  | 0.0000% | 0.0000% | 0.0000% | 0.0000% | 0.0000% | 0.0000% | 0.0000% | 0.0000% | 0.0000% | 0.0000% |
| 138 | IGKC                 | 12.778 | 8.98   | 0.0132% | 0.0186% | 0.0209% | 0.0175% | 0.0039% | 0.0089% | 0.0120% | 0.0084% | 0.0098% | 0.0019% |
| 139 | N/A                  | 12.711 | 8.182  | 0.0000% | 0.0000% | 0.0000% | 0.0000% | 0.0000% | 0.0000% | 0.0000% | 0.0000% | 0.0000% | 0.0000% |
| 140 | IGKV1-16             | 12.737 | 9.296  | 0.0226% | 0.0292% | 0.0283% | 0.0267% | 0.0035% | 0.0291% | 0.0335% | 0.0156% | 0.0261% | 0.0093% |
| 141 | IGKV1-17             | 12.781 | 8.163  | 0.0000% | 0.0000% | 0.0000% | 0.0000% | 0.0000% | 0.0000% | 0.0000% | 0.0000% | 0.0000% | 0.0000% |
| 142 | IGKV1-27             | 12.537 | 8.609  | 0.0033% | 0.0019% | 0.0017% | 0.0023% | 0.0008% | 0.0024% | 0.0000% | 0.0000% | 0.0008% | 0.0014% |
| 143 | IGKV1-39;IGKV1D-39   | 12.848 | 5.326  | 0.0240% | 0.0220% | 0.0289% | 0.0250% | 0.0035% | 0.0277% | 0.0297% | 0.0301% | 0.0292% | 0.0012% |
| 144 | IGKV1-5              | 13.079 | 8.523  | 0.0110% | 0.0115% | 0.0152% | 0.0126% | 0.0023% | 0.0141% | 0.0179% | 0.0156% | 0.0159% | 0.0019% |
| 145 | IGKV1-8;IGKV1-9      | 13.185 | 9.388  | 0.0308% | 0.0252% | 0.0272% | 0.0277% | 0.0028% | 0.0042% | 0.0032% | 0.0048% | 0.0041% | 0.0008% |
| 146 | IGKV1D-33;IGKV1-33   | 12.957 | 5.621  | 0.1945% | 0.1974% | 0.2173% | 0.2031% | 0.0124% | 0.3640% | 0.3174% | 0.2467% | 0.3094% | 0.0590% |
| 147 | IGKV2-24             | 12.625 | 4.875  | 0.2379% | 0.1939% | 0.2685% | 0.2334% | 0.0375% | 0.2420% | 0.2550% | 0.1966% | 0.2312% | 0.0307% |
| 148 | IGKV2-30             | 12.496 | 9.015  | 0.1692% | 0.1104% | 0.2214% | 0.1670% | 0.0556% | 0.3044% | 0.2719% | 0.2446% | 0.2736% | 0.0300% |
| 149 | IGKV2D-28;IGKV2-29;I | 12.557 | 9.367  | 0.2270% | 0.2202% | 0.2534% | 0.2336% | 0.0175% | 0.2682% | 0.2803% | 0.2323% | 0.2603% | 0.0250% |
| 150 | IGKV3-11;IGKV3D-11   | 12.534 | 5.007  | 0.0186% | 0.0196% | 0.0220% | 0.0201% | 0.0018% | 0.0265% | 0.0238% | 0.0229% | 0.0244% | 0.0018% |
| 151 | IGKV3-15             | 13.38  | 4.945  | 0.0494% | 0.0515% | 0.0502% | 0.0504% | 0.0011% | 0.0432% | 0.0626% | 0.0609% | 0.0556% | 0.0107% |
| 152 | IGKV3-20             | 12.34  | 7.041  | 0.0000% | 0.0000% | 0.0000% | 0.0000% | 0.0000% | 0.0000% | 0.0000% | 0.0000% | 0.0000% | 0.0000% |
| 153 | IGKV3D-15            | 22.83  | 8.2545 | 1.1381% | 1.2684% | 1.4158% | 1.2741% | 0.1390% | 1.0805% | 1.2062% | 1.2409% | 1.1759% | 0.0844% |
| 154 | IGKV4-1              | 11.265 | NaN    | 1.4646% | 1.4379% | 1.8244% | 1.5756% | 0.2159% | 1.4026% | 1.5546% | 1.6820% | 1.5464% | 0.1399% |
| 155 | IGKV6D-21            | 11.253 | 8.19   | 0.0092% | 0.0130% | 0.0156% | 0.0126% | 0.0032% | 0.0063% | 0.0074% | 0.0070% | 0.0069% | 0.0006% |
| 156 | IGLC1;IGL5           | 12.301 | 9.457  | 0.0000% | 0.0000% | 0.0000% | 0.0000% | 0.0000% | 0.0000% | 0.0000% | 0.0000% | 0.0000% | 0.0000% |
| 157 | IGLC2;IGLC3          | 12.283 | 6.946  | 0.0260% | 0.0350% | 0.0610% | 0.0407% | 0.0182% | 0.0696% | 0.0686% | 0.0757% | 0.0713% | 0.0039% |
| 158 | IGLC7                | 12.249 | 7.897  | 0.0424% | 0.0674% | 0.0422% | 0.0507% | 0.0145% | 0.0439% | 0.0498% | 0.0422% | 0.0453% | 0.0040% |
| 159 | IGLV1-40             | 12.412 | 5.602  | 0.0041% | 0.0033% | 0.0044% | 0.0040% | 0.0006% | 0.0019% | 0.0025% | 0.0000% | 0.0015% | 0.0013% |
| 160 | IGLV1-47;IGLV1-44    | 11.893 | 8.585  | 0.0006% | 0.0000% | 0.0000% | 0.0002% | 0.0004% | 0.0000% | 0.0000% | 0.0000% | 0.0000% | 0.0000% |
| 161 | IGLV1-51             | 12.441 | 4.575  | 0.0634% | 0.0680% | 0.0767% | 0.0694% | 0.0067% | 0.0458% | 0.0482% | 0.0486% | 0.0475% | 0.0015% |
| 162 | IGLV2-18             | 12.466 | 4.43   | 0.0311% | 0.0294% | 0.0332% | 0.0313% | 0.0019% | 0.0097% | 0.0130% | 0.0138% | 0.0122% | 0.0021% |
| 163 | IGLV2-23             | 12.042 | 6.187  | 0.0000% | 0.0005% | 0.0000% | 0.0002% | 0.0003% | 0.0000% | 0.0000% | 0.0016% | 0.0005% | 0.0009% |
| 164 | IGLV3-10             | 12.446 | 4.836  | 0.0900% | 0.0843% | 0.0871% | 0.0871% | 0.0028% | 0.1278% | 0.1553% | 0.1280% | 0.1370% | 0.0158% |
| 165 | IGLV3-16             | 12.332 | 7.096  | 0.0000% | 0.0000% | 0.0000% | 0.0000% | 0.0000% | 0.0000% | 0.0000% | 0.0000% | 0.0000% | 0.0000% |
| 166 | IGLV3-19             | 12.773 | 6.173  | 0.0000% | 0.0000% | 0.0000% | 0.0000% | 0.0000% | 0.0000% | 0.0000% | 0.0000% | 0.0000% | 0.0000% |
| 167 | IGLV3-21             | 13.394 | 7.7315 | 0.0017% | 0.0018% | 0.0021% | 0.0019% | 0.0002% | 0.0008% | 0.0009% | 0.0011% | 0.0009% | 0.0002% |
| 168 | IGLV3-9              | 12.468 | 6.834  | 0.0517% | 0.0460% | 0.0344% | 0.0440% | 0.0088% | 0.0132% | 0.0151% | 0.0155% | 0.0146% | 0.0012% |
| 169 | IGLV4-69             | 12.814 | 4.169  | 0.0226% | 0.0155% | 0.0271% | 0.0217% | 0.0058% | 0.0296% | 0.0333% | 0.0263% | 0.0297% | 0.0035% |
| 170 | IGLV5-39;IGLV5-45    | 22.963 | 10.303 | 0.0000% | 0.0006% | 0.0005% | 0.0004% | 0.0003% | 0.0009% | 0.0000% | 0.0000% | 0.0003% | 0.0005% |
| 171 | IGLV7-43;IGLV7-46    | 31.674 | 8.523  | 0.0000% | 0.0004% | 0.0000% | 0.0001% | 0.0002% | 0.0000% | 0.0019% | 0.0013% | 0.0011% | 0.0010% |
| 172 | IGLV8-61             | 66.034 | 6.455  | 0.0048% | 0.0053% | 0.0028% | 0.0043% | 0.0013% | 0.0042% | 0.0051% | 0.0070% | 0.0054% | 0.0014% |
| 173 | IGLL1                | 101.39 | 6.466  | 0.0931% | 0.1004% | 0.1045% | 0.0993% | 0.0058% | 0.0896% | 0.0983% | 0.0863% | 0.0914% | 0.0062% |
| 174 | N/A                  | 106.46 | 6.544  | 0.1508% | 0.1384% | 0.1417% | 0.1436% | 0.0064% | 0.1274% | 0.1080% | 0.1080% | 0.1144% | 0.0112% |
| 175 | IGFBP3               | 99.848 | 5.475  | 0.0148% | 0.0139% | 0.0167% | 0.0151% | 0.0014% | 0.0065% | 0.0066% | 0.0053% | 0.0061% | 0.0007% |
| 176 | IGFALS               | 103.36 | 6.667  | 0.1478% | 0.1287% | 0.1466% | 0.1411% | 0.0107% | 0.1069% | 0.1001% | 0.0961% | 0.1010% | 0.0054% |
| 177 | ITIH1                | 81.744 | 5.836  | 0.0011% | 0.0014% | 0.0020% | 0.0015% | 0.0004% | 0.0009% | 0.0002% | 0.0003% | 0.0005% | 0.0004% |
| 178 | ITIH2                | 48.541 | 7.524  | 0.0074% | 0.0088% | 0.0070% | 0.0077% | 0.0010% | 0.0097% | 0.0093% | 0.0086% | 0.0092% | 0.0006% |
| 179 | ITIH3                | 59.51  | 5.017  | 0.4165% | 0.4036% | 0.4267% | 0.4156% | 0.0115% | 0.4582% | 0.3930% | 0.3553% | 0.4022% | 0.0521% |
| 180 | ITIH4                | 51.621 | 4.955  | 0.0474% | 0.0351% | 0.0457% | 0.0427% | 0.0066% | 0.0447% | 0.0487% | 0.0415% | 0.0450% | 0.0036% |
| 181 | JUP                  | 51.267 | 4.848  | 0.0152% | 0.0140% | 0.0149% | 0.0147% | 0.0006% | 0.0163% | 0.0137% | 0.0134% | 0.0144% | 0.0016% |
| 182 | SERPINA4             | 62.064 | 5.02   | 0.6829% | 0.6750% | 0.6721% | 0.6767% | 0.0056% | 0.6657% | 0.6543% | 0.6149% | 0.6450% | 0.0267% |
| 183 | KRT10                | 53.5   | 5.449  | 0.0000% | 0.0000% | 0.0000% | 0.0000% | 0.0000% | 0.0000% | 0.0000% | 0.0000% | 0.0000% | 0.0000% |
| 184 | KRT14                | 66.038 | 8.045  | 1.0225% | 1.0182% | 1.1267% | 1.0558% | 0.0614% | 1.0097% | 1.0317% | 0.9833% | 1.0082% | 0.0242% |
| 185 | KRT16                | 65.432 | 7.888  | 0.2109% | 0.2085% | 0.2231% | 0.2142% | 0.0078% | 0.2034% | 0.1692% | 0.1563% | 0.1763% | 0.0244% |
| 186 | KRT9                 | 62.378 | 7.572  | 0.0251% | 0.0234% | 0.0252% | 0.0246% | 0.0010% | 0.0260% | 0.0263% | 0.0187% | 0.0236% | 0.0043% |
| 187 | KRT83;KRT81;KRT85;K  | 60.044 | 7.857  | 0.0419% | 0.0387% | 0.0435% | 0.0414% | 0.0025% | 0.0397% | 0.0329% | 0.0285% | 0.0337% | 0.0056% |
| 188 | KRT1                 | 58.923 | 6.958  | 0.0011% | 0.0006% | 0.0012% | 0.0010% | 0.0003% | 0.0021% | 0.0025% | 0.0018% | 0.0021% | 0.0004% |
| 189 | KRT2                 | 71.957 | 6.475  | 0.0789% | 0.0839% | 0.1213% | 0.0947% | 0.0232% | 0.0926% | 0.0887% | 0.0760% | 0.0858% | 0.0087% |
| 190 | KRT5                 | 38.177 | 6.612  | 0.1088% | 0.1296% | 0.1266% | 0.1217% | 0.0112% | 0.0540% | 0.0540% | 0.0357% | 0.0479% | 0.0105% |
| 191 | KRT6A;KRT6C          | 19.25  | 5.328  | 0.0008% | 0.0000% | 0.0007% | 0.0005% | 0.0004% | 0.0022% | 0.0025% | 0.0023% | 0.0023% | 0.0002% |
| 192 | KRT74;KRT73;KRT72    | 53.383 | 6.387  | 0.0063% | 0.0081% | 0.0050% | 0.0065% | 0.0016% | 0.0029% | 0.0025% | 0.0028% | 0.0027% | 0.0002% |
| 193 | KNG1                 | 38.429 | 6.294  | 0.0097% | 0.0145% | 0.0148% | 0.0130% | 0.0029% | 0.0137% | 0.0125% | 0.0124% | 0.0129% | 0.0007% |
| 194 | LRG1                 | 16.537 | 9.165  | 0.0026% | 0.0032% | 0.0031% | 0.0030% | 0.0003% | 0.0000% | 0.0000% | 0.0007% | 0.0002% | 0.0004% |
| 195 | LCN1                 | 26.143 | 5.27   | 0.0000% | 0.0000% | 0.0000% | 0.0000% | 0.0000% | 0.0000% | 0.0000% | 0.0000% | 0.0000% | 0.0000% |

|     |                    |        |        |          |          |          |          |         |          |          |          |          |         |
|-----|--------------------|--------|--------|----------|----------|----------|----------|---------|----------|----------|----------|----------|---------|
| 196 | LBP                | 69.521 | 8.474  | 0.0030%  | 0.0026%  | 0.0036%  | 0.0031%  | 0.0005% | 0.0049%  | 0.0054%  | 0.0034%  | 0.0046%  | 0.0011% |
| 197 | LUM                | 40.076 | 5.922  | 0.0039%  | 0.0043%  | 0.0026%  | 0.0036%  | 0.0009% | 0.0020%  | 0.0013%  | 0.0017%  | 0.0017%  | 0.0003% |
| 198 | LYZ                | 16.93  | 4.416  | 0.0000%  | 0.0000%  | 0.0000%  | 0.0000%  | 0.0000% | 0.0000%  | 0.0000%  | 0.0000%  | 0.0000%  | 0.0000% |
| 199 | MBL2               | 226.53 | 5.402  | 0.0002%  | 0.0001%  | 0.0001%  | 0.0001%  | 0.0001% | 0.0003%  | 0.0004%  | 0.0003%  | 0.0003%  | 0.0000% |
| 200 | MMMP16             | 62.216 | 7.262  | 0.0150%  | 0.0176%  | 0.0150%  | 0.0159%  | 0.0015% | 0.0153%  | 0.0170%  | 0.0199%  | 0.0174%  | 0.0023% |
| 201 | CD14               | 10.245 | 6.196  | 0.0000%  | 0.0042%  | 0.0000%  | 0.0014%  | 0.0024% | 0.0000%  | 0.0000%  | 0.0000%  | 0.0000%  | 0.0000% |
| 202 | MYL6               | 36.071 | 6.697  | 0.0000%  | 0.0000%  | 0.0000%  | 0.0000%  | 0.0000% | 0.0000%  | 0.0000%  | 0.0000%  | 0.0000%  | 0.0000% |
| 203 | MYH9               | 21.892 | 6.8495 | 0.0026%  | 0.0039%  | 0.0023%  | 0.0030%  | 0.0009% | 0.0063%  | 0.0020%  | 0.0050%  | 0.0044%  | 0.0022% |
| 204 | PGLYRPP2           | 46.312 | 6.083  | 0.0217%  | 0.0191%  | 0.0167%  | 0.0191%  | 0.0025% | 0.0247%  | 0.0320%  | 0.0314%  | 0.0294%  | 0.0041% |
| 205 | DEFA3;DEFA1;DEFA18 | 71.369 | 8.015  | 0.0057%  | 0.0050%  | 0.0061%  | 0.0056%  | 0.0006% | 0.0076%  | 0.0061%  | 0.0074%  | 0.0070%  | 0.0008% |
| 206 | PDUM1              | 55.154 | 6.232  | 0.2203%  | 0.2138%  | 0.2234%  | 0.2192%  | 0.0049% | 0.2088%  | 0.2024%  | 0.2007%  | 0.2040%  | 0.0043% |
| 207 | PRDX2;PRDX1        | 45.674 | 9.469  | 0.0008%  | 0.0009%  | 0.0009%  | 0.0009%  | 0.0001% | 0.0015%  | 0.0004%  | 0.0023%  | 0.0014%  | 0.0010% |
| 208 | SERPINF1           | 90.568 | 6.939  | 0.1041%  | 0.1055%  | 0.1035%  | 0.1043%  | 0.0010% | 0.1024%  | 0.0885%  | 0.0956%  | 0.0955%  | 0.0069% |
| 209 | KLKB1              | 13.894 | 8.799  | 0.0039%  | 0.0042%  | 0.0034%  | 0.0038%  | 0.0004% | 0.0118%  | 0.0145%  | 0.0234%  | 0.0166%  | 0.0061% |
| 210 | SERPING1           | 10.845 | 8.877  | 0.0075%  | 0.0069%  | 0.0094%  | 0.0079%  | 0.0013% | 0.0203%  | 0.0241%  | 0.0318%  | 0.0254%  | 0.0059% |
| 211 | SERPINA5           | 60.958 | 9.881  | 0.0000%  | 0.0000%  | 0.0000%  | 0.0000%  | 0.0000% | 0.0000%  | 0.0000%  | 0.0000%  | 0.0000%  | 0.0000% |
| 212 | PLG                | 83.283 | 5.502  | 0.0034%  | 0.0027%  | 0.0030%  | 0.0030%  | 0.0004% | 0.0005%  | 0.0000%  | 0.0000%  | 0.0002%  | 0.0003% |
| 213 | PPBP               | 15.054 | 8.196  | 0.0002%  | 0.0007%  | 0.0000%  | 0.0003%  | 0.0003% | 0.0016%  | 0.0025%  | 0.0016%  | 0.0019%  | 0.0005% |
| 214 | PF4;PF4V1          | 16.572 | 7.864  | 0.0026%  | 0.0029%  | 0.0028%  | 0.0028%  | 0.0001% | 0.0184%  | 0.0267%  | 0.0318%  | 0.0256%  | 0.0067% |
| 215 | GP5                | 51.276 | 7.697  | 0.0000%  | 0.0000%  | 0.0000%  | 0.0000%  | 0.0000% | 0.0000%  | 0.0000%  | 0.0000%  | 0.0000%  | 0.0000% |
| 216 | PIGR               | 38.999 | 5.959  | 0.0921%  | 0.0899%  | 0.1025%  | 0.0948%  | 0.0067% | 0.0849%  | 0.1032%  | 0.0942%  | 0.0941%  | 0.0091% |
| 217 | PFN1               | 10.575 | 5.957  | 0.0000%  | 0.0000%  | 0.0000%  | 0.0000%  | 0.0000% | 0.0000%  | 0.0000%  | 0.0000%  | 0.0000%  | 0.0000% |
| 218 | PIP                | 10.18  | 5.238  | 0.0000%  | 0.0000%  | 0.0000%  | 0.0000%  | 0.0000% | 0.0000%  | 0.0000%  | 0.0000%  | 0.0000%  | 0.0000% |
| 219 | CFP                | 10.834 | 6.715  | 0.0000%  | 0.0000%  | 0.0000%  | 0.0000%  | 0.0000% | 0.0000%  | 0.0000%  | 0.0000%  | 0.0000%  | 0.0000% |
| 220 | AMBP               | 13.242 | 5.84   | 0.0035%  | 0.0116%  | 0.0087%  | 0.0080%  | 0.0041% | 0.0173%  | 0.0203%  | 0.0205%  | 0.0194%  | 0.0018% |
| 221 | S100A12            | 50.706 | 8.286  | 0.0000%  | 0.0000%  | 0.0001%  | 0.0000%  | 0.0000% | 0.0000%  | 0.0001%  | 0.0001%  | 0.0001%  | 0.0000% |
| 222 | S100A6             | 151.06 | 9.784  | 0.0001%  | 0.0003%  | 0.0002%  | 0.0002%  | 0.0001% | 0.0000%  | 0.0003%  | 0.0004%  | 0.0002%  | 0.0002% |
| 223 | S100A8             | 70.036 | 5.618  | 0.1141%  | 0.1093%  | 0.1168%  | 0.1134%  | 0.0038% | 0.1058%  | 0.1171%  | 0.1243%  | 0.1157%  | 0.0093% |
| 224 | S100A9             | 34.49  | 7.733  | 0.0073%  | 0.0057%  | 0.0072%  | 0.0067%  | 0.0009% | 0.0054%  | 0.0045%  | 0.0034%  | 0.0044%  | 0.0010% |
| 225 | SERPINA10          | 29.117 | 5.583  | 0.0000%  | 0.0000%  | 0.0000%  | 0.0000%  | 0.0000% | 0.0000%  | 0.0000%  | 0.0000%  | 0.0000%  | 0.0000% |
| 226 | PRG4               | 20.987 | 5.513  | 0.0000%  | 0.0000%  | 0.0000%  | 0.0000%  | 0.0000% | 0.0000%  | 0.0000%  | 0.0003%  | 0.0001%  | 0.0002% |
| 227 | F2                 | 23.01  | 5.749  | 0.0498%  | 0.0430%  | 0.0518%  | 0.0482%  | 0.0046% | 0.0528%  | 0.0541%  | 0.0333%  | 0.0467%  | 0.0116% |
| 228 | GULP1              | 24.337 | 8.189  | 0.0007%  | 0.0011%  | 0.0011%  | 0.0010%  | 0.0002% | 0.0005%  | 0.0000%  | 0.0000%  | 0.0002%  | 0.0003% |
| 229 | KRT87P             | 43.173 | 7.68   | 0.0011%  | 0.0007%  | 0.0015%  | 0.0011%  | 0.0004% | 0.0028%  | 0.0022%  | 0.0013%  | 0.0021%  | 0.0008% |
| 230 | RAP1B;RAP1A        | 77.063 | 6.795  | 1.9340%  | 1.9234%  | 2.0327%  | 1.9634%  | 0.0603% | 2.1686%  | 2.2714%  | 2.1599%  | 2.2000%  | 0.0621% |
| 231 | RBP4               | 69.366 | 5.974  | 35.2375% | 36.2679% | 35.6684% | 35.7246% | 0.5175% | 37.0151% | 36.4787% | 37.0480% | 36.8473% | 0.3196% |
| 232 | SPP2               | 13.532 | 6.481  | 0.0867%  | 0.0920%  | 0.0920%  | 0.0902%  | 0.0031% | 0.0081%  | 0.0092%  | 0.0091%  | 0.0088%  | 0.0006% |
| 233 | SELENOP            | 14.746 | 9.206  | 0.0481%  | 0.0363%  | 0.0442%  | 0.0429%  | 0.0060% | 0.0353%  | 0.0393%  | 0.0265%  | 0.0337%  | 0.0065% |
| 234 | TF                 | 25.387 | 6.24   | 0.0559%  | 0.0501%  | 0.0387%  | 0.0482%  | 0.0088% | 0.0563%  | 0.0505%  | 0.0465%  | 0.0511%  | 0.0049% |
| 235 | ALB                | 39.731 | 4.988  | 0.0714%  | 0.0730%  | 0.0719%  | 0.0719%  | 0.0009% | 0.0997%  | 0.1209%  | 0.1225%  | 0.1144%  | 0.0127% |
| 236 | SAA1               | 43.779 | 6.383  | 0.0025%  | 0.0024%  | 0.0023%  | 0.0024%  | 0.0001% | 0.0014%  | 0.0024%  | 0.0019%  | 0.0019%  | 0.0005% |
| 237 | SAA4               | 52.991 | 8.98   | 0.0190%  | 0.0242%  | 0.0082%  | 0.0171%  | 0.0082% | 0.0605%  | 0.0504%  | 0.0484%  | 0.0531%  | 0.0065% |
| 238 | APCS               | 80.909 | 5.847  | 0.0016%  | 0.0012%  | 0.0021%  | 0.0016%  | 0.0005% | 0.0025%  | 0.0027%  | 0.0020%  | 0.0024%  | 0.0004% |
| 239 | PON1               | 82.577 | 8.942  | 0.0000%  | 0.0000%  | 0.0000%  | 0.0000%  | 0.0000% | 0.0000%  | 0.0000%  | 0.0000%  | 0.0000%  | 0.0000% |
| 240 | SHBG               | 60.54  | 6.698  | 0.0007%  | 0.0006%  | 0.0009%  | 0.0007%  | 0.0002% | 0.0006%  | 0.0006%  | 0.0007%  | 0.0006%  | 0.0000% |
| 241 | SIGLEC16           | 127.57 | 6.969  | 0.0168%  | 0.0000%  | 0.0000%  | 0.0056%  | 0.0097% | 0.0000%  | 0.0000%  | 0.0097%  | 0.0032%  | 0.0056% |
| 242 | SCLT1              | 269.76 | 5.805  | 0.0003%  | 0.0002%  | 0.0002%  | 0.0003%  | 0.0001% | 0.0005%  | 0.0006%  | 0.0006%  | 0.0006%  | 0.0001% |
| 243 | QSOX1              | 57.034 | 5.351  | 0.0000%  | 0.0000%  | 0.0000%  | 0.0000%  | 0.0000% | 0.0000%  | 0.0000%  | 0.0000%  | 0.0000%  | 0.0000% |
| 244 | SBSN               | 22.537 | 5.44   | 0.0084%  | 0.0059%  | 0.0068%  | 0.0070%  | 0.0013% | 0.0264%  | 0.0102%  | 0.0182%  | 0.0183%  | 0.0081% |
| 245 | STXBP5             | 129.38 | 4.569  | 0.0002%  | 0.0002%  | 0.0003%  | 0.0002%  | 0.0000% | 0.0005%  | 0.0006%  | 0.0005%  | 0.0005%  | 0.0001% |
| 246 | TCP11L1            | 46.324 | 6.002  | 0.0042%  | 0.0057%  | 0.0074%  | 0.0058%  | 0.0016% | 0.0064%  | 0.0079%  | 0.0061%  | 0.0068%  | 0.0010% |
| 247 | TLN1               | 74.68  | 7.476  | 0.0017%  | 0.0022%  | 0.0025%  | 0.0021%  | 0.0004% | 0.0006%  | 0.0008%  | 0.0006%  | 0.0007%  | 0.0001% |
| 248 | CLEC3B             | 22.391 | 8.143  | 0.0000%  | 0.0000%  | 0.0000%  | 0.0000%  | 0.0000% | 0.0001%  | 0.0000%  | 0.0000%  | 0.0000%  | 0.0000% |
| 249 | THBS1              | 15.887 | 5.5    | 0.8741%  | 0.8682%  | 0.9584%  | 0.9003%  | 0.0505% | 1.4872%  | 1.4924%  | 1.6273%  | 1.5356%  | 0.0794% |
| 250 | SERPINA7           | 32.528 | 7.251  | 0.0000%  | 0.0000%  | 0.0000%  | 0.0000%  | 0.0000% | 0.0033%  | 0.0025%  | 0.0029%  | 0.0029%  | 0.0004% |
| 251 | TGFBI              | 27.551 | 4.821  | 0.0000%  | 0.0000%  | 0.0001%  | 0.0000%  | 0.0001% | 0.0002%  | 0.0001%  | 0.0000%  | 0.0001%  | 0.0001% |
| 252 | TAGLN2             | 50.326 | 4.942  | 0.0002%  | 0.0003%  | 0.0000%  | 0.0002%  | 0.0002% | 0.0004%  | 0.0006%  | 0.0007%  | 0.0006%  | 0.0001% |
| 253 | TTR                | 38.213 | 9.094  | 0.0017%  | 0.0014%  | 0.0032%  | 0.0021%  | 0.0010% | 0.0034%  | 0.0031%  | 0.0021%  | 0.0029%  | 0.0007% |
| 254 | PRSS3              | 52.917 | 5.302  | 0.4935%  | 0.4439%  | 0.4529%  | 0.4634%  | 0.0264% | 0.4560%  | 0.4823%  | 0.4319%  | 0.4567%  | 0.0252% |
| 255 | TUBA1B;TUBA4A;TUB  | 52.071 | 5.951  | 0.0003%  | 0.0005%  | 0.0000%  | 0.0003%  | 0.0003% | 0.0001%  | 0.0001%  | 0.0003%  | 0.0002%  | 0.0001% |
| 256 | TUBB1              | 75.122 | 5.41   | 0.0297%  | 0.0286%  | 0.0259%  | 0.0281%  | 0.0019% | 0.0289%  | 0.0277%  | 0.0256%  | 0.0274%  | 0.0017% |
| 257 | ST3GAL6            | 54.305 | 5.519  | 0.1135%  | 0.1248%  | 0.1052%  | 0.1145%  | 0.0098% | 0.0862%  | 0.0957%  | 0.0795%  | 0.0871%  | 0.0081% |
| 258 | GC                 | 309.26 | 5.208  | 0.0038%  | 0.0033%  | 0.0034%  | 0.0035%  | 0.0003% | 0.0000%  | 0.0000%  | 0.0000%  | 0.0000%  | 0.0000% |
| 259 | PROC               | 34.258 | 5.763  | 0.0734%  | 0.0630%  | 0.0680%  | 0.0681%  | 0.0052% | 0.0856%  | 0.0842%  | 0.0670%  | 0.0789%  | 0.0103% |
| 260 | PROS1              | 48.934 | 6.2    | 0.0671%  | 0.0521%  | 0.0744%  | 0.0646%  | 0.0114% | 0.0670%  | 0.0653%  | 0.0656%  | 0.0660%  | 0.0009% |
| 261 | VTN                | 56.224 | 8.26   | 0.0079%  | 0.0075%  | 0.0088%  | 0.0081%  | 0.0007% | 0.0060%  | 0.0045%  | 0.0054%  | 0.0053%  | 0.0007% |
| 262 | VWF                | 63.485 | 8.12   | 0.0000%  | 0.0000%  | 0.0000%  | 0.0000%  | 0.0000% | 0.0000%  | 0.0000%  | 0.0000%  | 0.0000%  | 0.0000% |
| 263 | AZGP1              | 23.379 | 6.9    | 2.7306%  | 2.6560%  | 2.9209%  | 2.7691%  | 0.1366% | 3.4176%  | 3.8881%  | 3.8738%  | 3.7265%  | 0.2676% |
